# Supplementary material
Source: PubMed Central journal article supplement (PMC5964519)
Supplement: IAI.00109-18_zii999092420s1.pdf [file IAI.00109-18_zii999092420s1.pdf]

Supplemental Figure 1

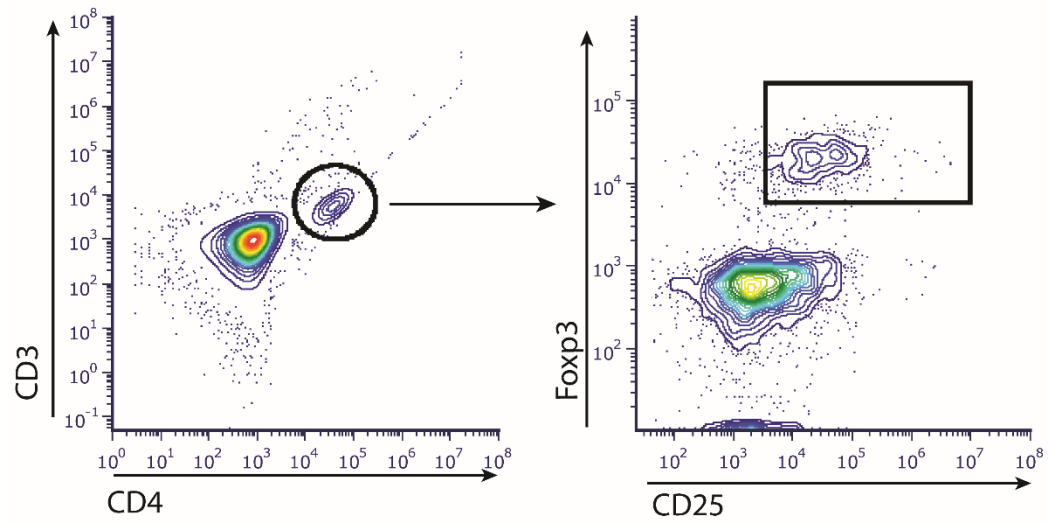

**Supplemental Figure 1 Treg gating strategy**

Cells were first gated on CD3<sup>+</sup>CD4<sup>+</sup> and then Foxp3<sup>+</sup>CD25<sup>+</sup>.

Supplemental Figure 2

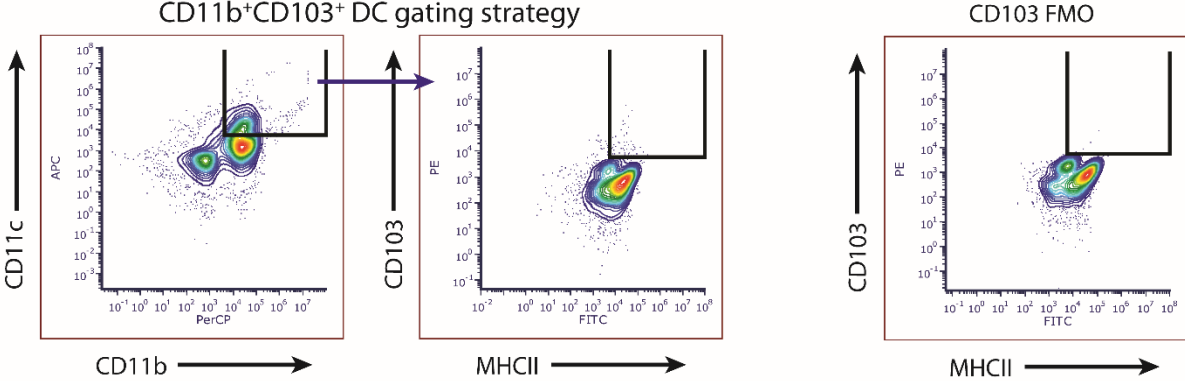

**Supplemental Figure 2 CD11b<sup>+</sup>CD103<sup>+</sup> DC gating strategy**

Cells were gated on first on CD11c<sup>+</sup>CD11b<sup>+</sup> and then MHCII<sup>+</sup>CD103<sup>+</sup>. CD103 FMO is shown on right.

Supplemental Fig 3

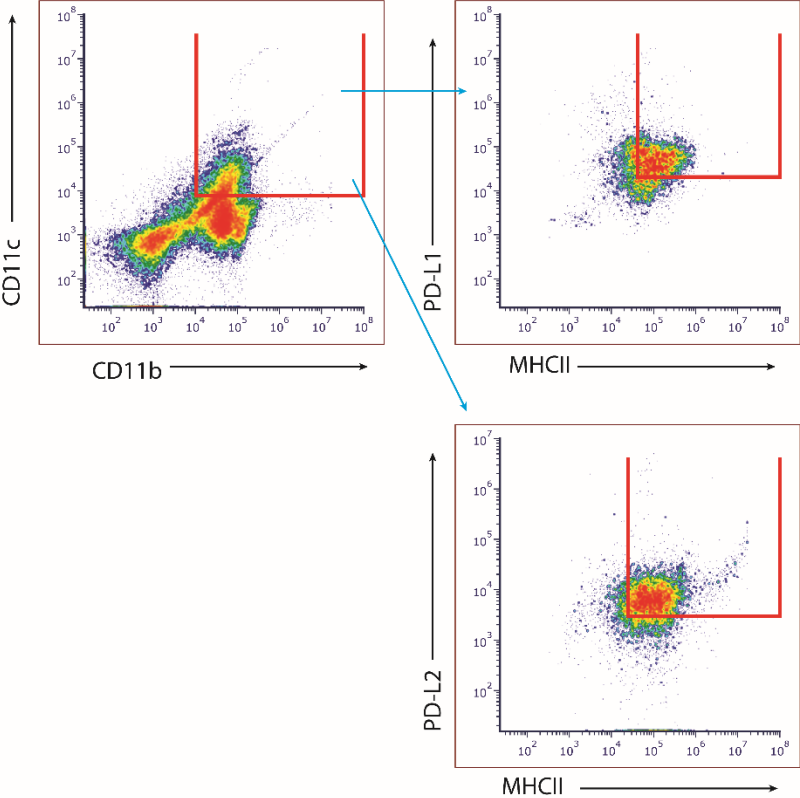

**Supplemental Figure 3: PD-L1 and PD-L2 DC gating strategy**

Cells were gated on first on CD11c<sup>+</sup>CD11b<sup>+</sup> and then MHCII<sup>+</sup>PD-L1<sup>+</sup> or MHCII<sup>+</sup>PD-L2<sup>+</sup>.

## Supplemental Figure 4

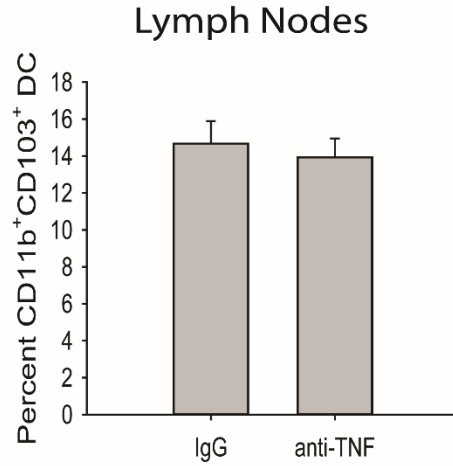

### **Supplemental Figure 4 CD11b<sup>+</sup>CD103<sup>+</sup> DCs are present in lung draining lymph nodes**

Mice were infected with  $2 \times 10^6$  *H. capsulatum* yeasts i.n. and treated with anti-TNF or isotype control antibody. Lymph nodes were harvested a day 3 p.i. and DCs were assessed by flow cytometry. Figure represents the mean  $\pm$  SEM (n=8 mice/group; representative of two experiments).
